# Supplementary material
Source: Research Square preprint supplement (doi:10.21203/rs.3.rs-8801141/v1)
Supplement: Supplementary file 1 [file 6fa973ba2b639c2d8500e436.docx]

# Epidemiology and risk factors of hearing loss in thyroid eye disease in the United States: A retrospective study of MarketScan® data

Jason A. Brant1, Vinaya Manchaiah2, Junjie Ma3, Deepika Chauhan3, Patricia Franco3, Haridarshan Patel3

1Department of Otorhinolaryngology – Head and Neck Surgery, University of Wisconsin, 600 Highland Ave, Madison, WI 53792, USA

2Department of Otolaryngology-Head and Neck Surgery, University of Colorado School of Medicine, 12631 E 17th Ave, Aurora, CO 80045, USA

3Amgen Inc., 1 Amgen Center Drive, Thousand Oaks, CA 91320, USA

**Corresponding Author**: Jason Brant

University of Wisconsin School of Medicine and Public Health,

600 Highland Ave, Madison, WI 53792, USA

215-847-4444

[Jabrant@wisc.edu](mailto:Jabrant@wisc.edu)

## ADDITIONAL MATERIAL

## Additional Table 1. Age- and sex-standardized cumulative incidence, incidence rates, and prevalence of hearing loss

|  | **TED**  **N=38723** | **GD**  **N=171831** | **GP**  **N=20283009** |
| --- | --- | --- | --- |
| Cumulative incidence, % (95% CI) | | | |
| Hearing loss (composite outcome) | 2.8% (2.6%, 3.0%) | 2.0% (1.9%, 2.0%) | 1.6% (1.6%, 1.6%) |
| Conductive hearing loss | 0.4% (0.3%, 0.5%) | 0.2% (0.2%, 0.2%) | 0.1% (0.1%, 0.1%) |
| Sensorineural hearing loss | 2.1% (2.0%, 2.2%) | 1.4% (1.3%, 1.4%) | 1.1% (1.1%, 1.1%) |
| Mixed conductive and sensorineural hearing loss | 0.2% (0.2%, 0.2%) | 0.2% (0.1%, 0.1%) | 0.1% (0.1%, 0.1%) |
| Age-related hearing loss | 0.0% (0.0%, 0.0%) | 0.0% (0.0%, 0.0%) | 0.0% (0.0%, 0.0%) |
| Other hearing loss | 0.9% (0.8%, 0.9%) | 0.7% (0.6%, 0.7%) | 0.5% (0.5%, 0.5%) |
| Incidence, per 10000 person-years (95% CI) | | | |
| Hearing loss (composite outcome) | 142.2 (132.3, 152.1) | 92.0 (88.2, 95.7) | 67.6 (67.3, 67.9) |
| Conductive hearing loss | 19.1 (13.2, 24.9) | 7.7 (6.6, 8.8) | 5.2 (5.2, 5.3) |
| Sensorineural hearing loss | 105.1 (96.7, 113.6) | 63.2 (60.2, 66.3) | 46.9 (46.7, 47.1) |
| Mixed conductive and sensorineural hearing loss | 10.2 (7.3, 13.0) | 6.7 (5.7, 7.7) | 4.6 (4.5, 4.7) |
| Age-related hearing loss | 0.5 (0.1, 1.0) | 1.1 (0.7, 1.4) | 0.7 (0.7, 0.8) |
| Other hearing loss | 42.6 (37.5, 47.6) | 29.9 (27.8, 32.1) | 21.6 (21.4, 21.7) |
| Prevalence, % (95% CI) | | | |
| Hearing loss (composite outcome) | 4.6% (4.4%, 4.8%) | 3.0% (2.9%, 3%) | 2.2% (2.2%, 2.2%) |
| Conductive hearing loss | 0.5% (0.4%, 0.6%) | 0.3% (0.2%, 0.3%) | 0.2% (0.2%, 0.1%) |
| Sensorineural hearing loss | 3.3% (3.1%, 3.4%) | 2.0% (1.9%, 2%) | 1.6% (1.5%, 1.5%) |
| Mixed conductive and sensorineural hearing loss | 0.4% (0.3%, 0.4%) | 0.2% (0.2%, 0.2%) | 0.2% (0.1%, 0.1%) |
| Age-related hearing loss | 0.0% (0.0%, 0.0%) | 0.0% (0.0%, 0.0%) | 0.0% (0.0%, 0.0%) |
| Other hearing loss | 1.3% (1.1%, 1.3%) | 0.9% (0.8%, 0.9%) | 0.7% (0.7%, 0.6%) |

Table summarizing age- and gender-standardized cumulative incidence, incidence rates, and prevalence of hearing loss (composite outcome) subcategories across study cohorts.

CI, confidence interval; GD, Graves’ disease; GP, general population; N, number of patients; TED, thyroid eye disease.

## Additional Table 2. Code list for patient selection and hearing loss

|  | **ICD-9-CM** | | **ICD-10-CM** | |
| --- | --- | --- | --- | --- |
| Graves’ disease | 376.2 | Endocrine exophthalmos | E05 | Thyrotoxicosis [hyperthyroidism] |
| 242 | Thyrotoxicosis with or without goiter | E06.2 | Chronic thyroiditis with transient thyrotoxicosis |
| 246.9 | Unspecified disorder of thyroid |  |  |
| Eye signs and symptoms | | | | |
| Exophthalmos | 376.30 | Exophthalmos, unspecified | H05.20 | Unspecified exophthalmos |
| 376.31 | Constant exophthalmos | H05.21 | Displacement (lateral) of globe |
| 376.32 | Orbital hemorrhage | H05.32 | Deformity of orbit due to bone disease |
| 376.33 | Orbital edema or congestion | H05.24 | Constant exophthalmos |
| 376.36 | Lateral displacement of globe | H05.259 | Intermittent exophthalmos, unspecified eye |
| 376.46 | Enlargement of orbit | H05.269 | Pulsating exophthalmos, unspecified eye |
|  |  | H05.341 | Enlargement of right orbit |
|  |  | H05.342 | Enlargement of left orbit |
|  |  | H05.349 | Enlargement of unspecified orbit |
| Diplopia | 368.2 | Diplopia | H53.2 | Diplopia |
| Lid retraction | 374.20 | Lagophthalmos, unspecified | H02.2 | Lagophthalmos |
| 374.41 | Lid retraction or lag | H02.53 | Eyelid retraction |
| 374.22 | Mechanical lagophthalmos |  |  |
| Orbital inflammation/disorders | 368.30 | Binocular vision disorder, unspecified | H05.00 | Unspecified acute inflammation of orbit |
| 376.00 | Acute inflammation of orbit, unspecified | H05.10 | Unspecified chronic inflammatory disorders of orbit |
| 376.10 | Chronic inflammation of orbit, unspecified | H05.89 | Other disorders of orbit |
| 377.49 | Other disorders of optic nerve | H47.09 | Other disorders of optic nerve, not elsewhere classified |
| 379.90 | Disorder of eye, unspecified | H57.8 | Other specified disorders of eye and adnexa |
|  |  | H57.9 | Unspecified disorders of eye and adnexa |
|  |  | H53.30 | Unspecified disorders of binocular vision |
|  |  | H53.34 | Suppression of binocular vision |
| Strabismus | 378.0 | Esotropia | H50.0 | Esotropia |
| 378.1 | Exotropia | H50.1 | Exotropia |
| 378.2 | Intermittent heterotropia | H50.2 | Vertical strabismus |
| 378.3 | Other and unspecified heterotropia | H50.3 | Intermittent heterotropia |
| 378.60 | Mechanical strabismus, unspecified | H50.4 | Other and unspecified heterotropia |
| 378.9 | Unspecified disorders of eye movements | H50.5 | Heterotropia |
|  |  | H50.6 | Mechanical strabismus |
|  |  | H50.89 | Other specified strabismus |
|  |  | H50.9 | Unspecified strabismus |
|  |  | H49 | Paralytic strabismus |
| Hearing loss | | | | |
| Conductive hearing loss | 389.0 | Conductive hearing loss | H90.0 | Conductive hearing loss, bilateral |
|  |  | H90.1 | Conductive hearing loss, unilateral with unrestricted hearing on the contralateral side |
|  |  | H90.2 | Conductive hearing loss, unspecified |
|  |  | H90.A11 | Conductive hearing loss, unilateral, right ear with restricted hearing on the contralateral side |
| Sensorineural hearing loss | 388.12 | Noise-induced hearing loss | H90.3 | Sensorineural hearing loss, bilateral |
| 389.1 | Sensorineural hearing loss | H90.4 | Sensorineural hearing loss, unilateral with unrestricted hearing on the contralateral side |
| 389.7 | Deaf, nonspeaking, not elsewhere classifiable | H90.5 | Unspecified sensorineural hearing loss |
|  |  | H90.A22 | Sensorineural hearing loss, unilateral, left ear, with restricted hearing on the contralateral side |
|  |  | H90.A21 | Sensorineural hearing loss, unilateral, right ear, with restricted hearing on the contralateral side |
|  |  | H91.2 | Sudden idiopathic hearing loss |
| Age-related hearing loss | 388.01 | Presbycusis | H91.10 | Presbycusis, bilateral |
|  |  | H91.13 | Presbycusis, unspecified ear |
| Mixed conductive and sensorineural hearing loss | 389.21 | Mixed hearing loss, unilateral | H90.6 | Mixed conductive and sensorineural hearing loss, bilateral |
| 389.22 | Mixed hearing loss, bilateral | H90.7 | Mixed conductive and sensorineural hearing loss, unilateral with unrestricted hearing on the contralateral side |
|  |  | H90.8 | Mixed conductive and sensorineural hearing loss, unspecified |
|  |  | H90.A31 | Mixed conductive and sensorineural hearing loss, unilateral, right ear with restricted hearing on the contralateral side |
|  |  | H90.A32 | Mixed conductive and sensorineural hearing loss, unilateral, left ear with restricted hearing on the contralateral side |
| Other hearing loss | 388.2 | Sudden hearing loss, unspecified | H91.9 | Unspecified hearing loss |
| 389.8 | Other specified forms of hearing loss | H91.8X | Other specified hearing loss |
| 389.9 | Unspecified hearing loss |  |  |

Table summarizing ICD-9-CM & ICD-10-CM codes used to identify study cohorts and primary outcomes.

ICD-9-CM, International Classification of Diseases, Ninth Revision, Clinical Modification; ICD-10-CM, International Classification of Diseases, Tenth Revision, Clinical Modification.

## Additional Figure 1. Predictors of sensorineural hearing loss


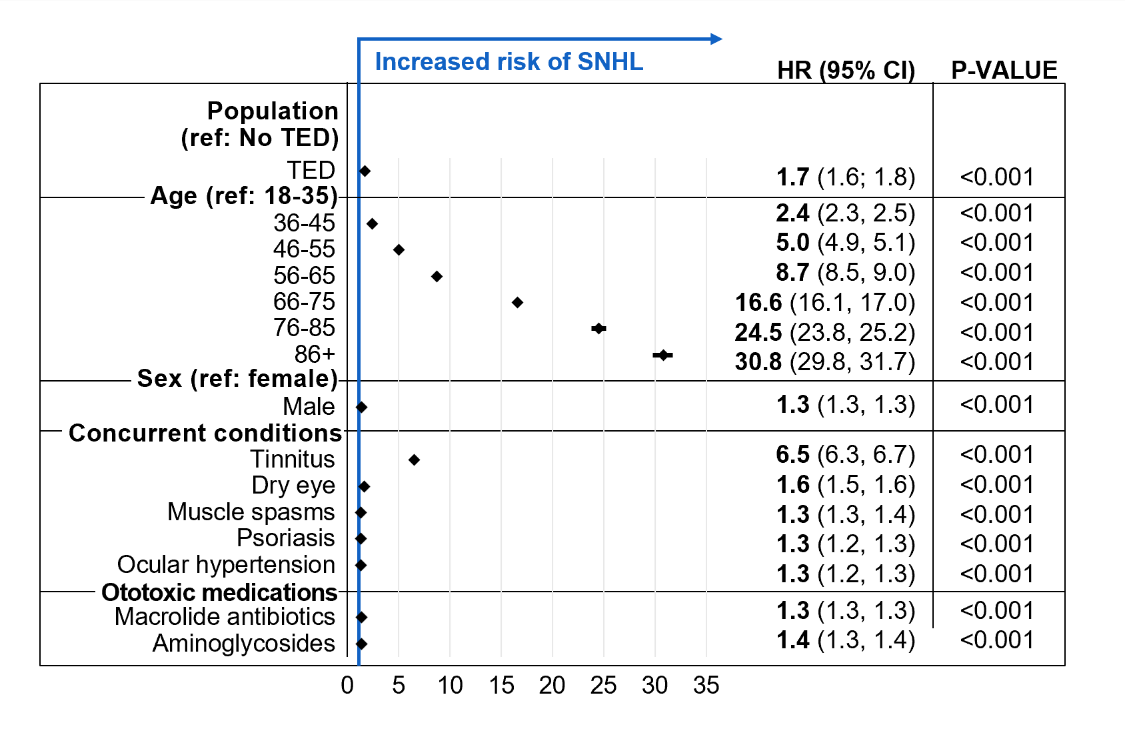


Graph illustrating the hazard ratios associated with predictors of sensorineural hearing loss.

1Only clinically meaningful predictors (HR ≥1.3) of hearing loss are displayed. Other predictors (HR>1.0) included: GD, baseline concurrent conditions (i.e., systemic lupus erythematosus, rheumatoid arthritis, type 1 diabetes, glaucoma, obesity, dyslipidemia/hyperlipidemia, mental health disorders, ischemic heart disease, vitamin D deficiency), and use of ototoxic medications (i.e., salicylates, nonsteroidal anti-inflammatory drugs, opioids, quinine-based medications). Additional variables (i.e., non-predictors) included in the model were as follows: geographic region, baseline concurrent conditions (i.e., type 2 diabetes, smoking or nicotine dependency, hypertension, chronic obstructive pulmonary disease [COPD], chronic kidney disease [CKD] without dialysis, non-AD dementia, hyperglycemia), and use of ototoxic medications (i.e., erythromycin, loop diuretics, chemotherapy drugs).

CI, confidence interval; HR, hazard ratio; TED, thyroid eye disease.

## Additional Figure 2. Risk of sensorineural hearing loss over time


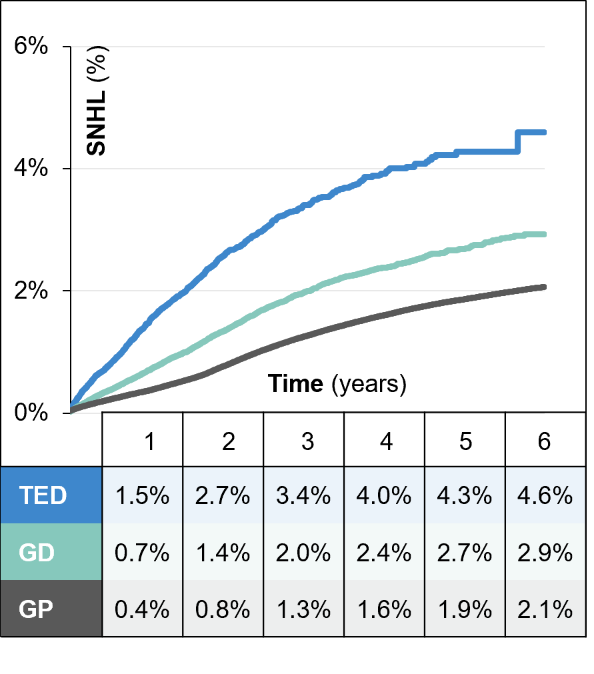


Kaplan-Meier estimates of risk of hearing loss over time among study cohorts.

GD, Graves’ disease; GP, general population; TED, thyroid eye disease.
